# Focus

The Journal of Lifelong Learning in Psychiatry

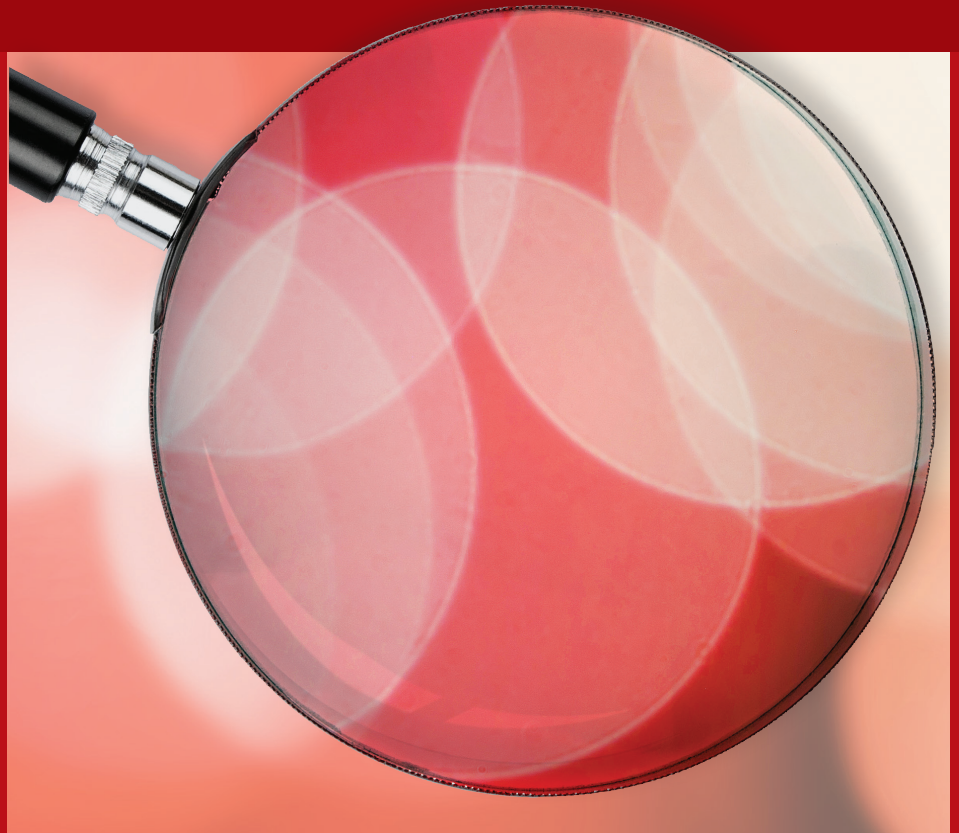

## Anxiety and Stress-Related Disorders

Guest Editor: Eric Bui, M.D., Ph.D.
