# Focus

The Journal of Lifelong Learning in Psychiatry

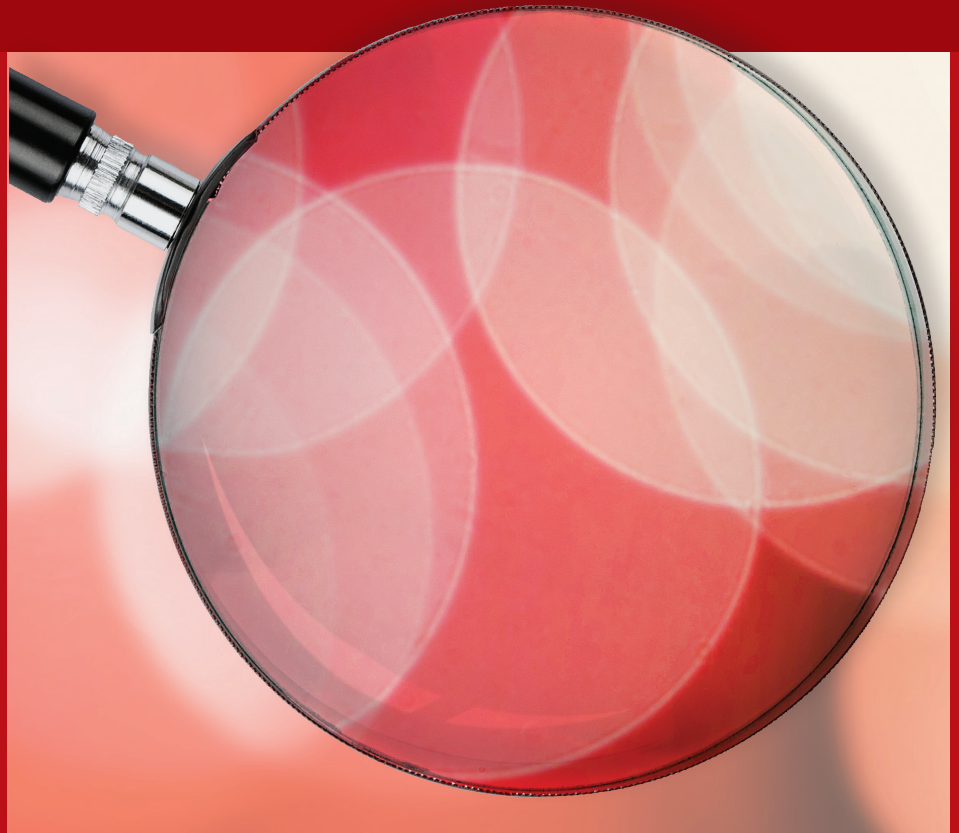

## Anxiety and Stress-Related Disorders

Guest Editor: Eric Bui, M.D., Ph.D.

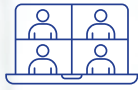

AMERICAN  
**PSYCHIATRIC**  
ASSOCIATION

**ANNUAL MEETING**  
ON DEMAND 2021

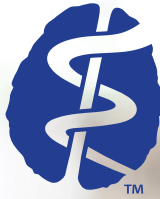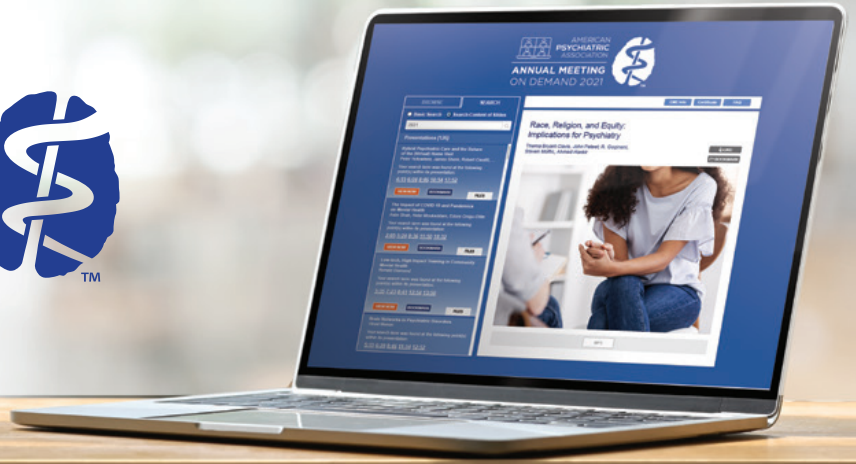

# Psychiatric education and CME — on your time and terms

Access the most recent and relevant science, insights and education in psychiatry — whenever and wherever you choose.

Curated by the world's largest psychiatric organization, APA Annual Meeting On Demand 2021 delivers comprehensive and convenient access to the latest research, new therapies and emerging clinical topics like COVID-19, health equity and global, political and social issues.

Access more than 400 hours of high-quality education from psychiatry thought leaders and earn up to 75 AMA PRA Category 1 Credits™ on your time and terms with On Demand!

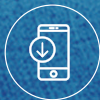

**Sync across  
all your devices**

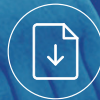

**Download PDFs  
and MP3s**

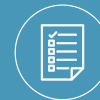

**Earn  
CME credits**

## Order Now!

***APA.OnDemand.org/2021***

**800-501-2303 (U.S Only)  
or 818-844-3299**

**Mon-Fri 6 a.m.-5 p.m. PT**

**General Pricing: \$899**

**APA Resident Pricing: \$199**

**APA Medical Student Pricing: \$199**

**USB Add On: \$99**

The American Psychiatric Association is accredited by the Accreditation Council for Continuing Medical Education to provide continuing medical education for physicians. The APA designates this enduring material for a maximum of 75 AMA PRA Category 1 Credits™. Physicians should claim only the credit commensurate with the extent of their participation in the activity.

Non-physician Health Care Professionals: The APA acknowledges non-physician participation in this educational activity through a certificate of participation. The activity has been designated for up to 75 AMA PRA Category 1 Credits™.

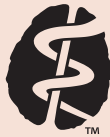

## APA Publishing

### Publisher

John McDuffie  
*Editorial Director, Journals*  
Michael D. Roy  
*Managing Editor, Journals*  
Demarie S. Jackson  
*Production Manager, Journals*  
Wendy Lieberman Taylor

## APA Department of Continuing Medical Education

*Associate Director, Focus*  
Kristen Moeller  
*Editorial Manager, CME and MOC*  
Ann Thomas

*Focus* (ISSN 1541-4094) is published quarterly by the American Psychiatric Association, 800 Maine Ave. S.W., Suite 900, Washington, D.C. 20024. Printed in U.S.A. Periodicals postage paid at Washington, D.C., and additional mailing offices. POSTMASTER: Send all address changes to *Focus*, Circulation Department, American Psychiatric Association Publishing, 800 Maine Ave. S.W., Suite 900, Washington, D.C. 20024.

## Subscriptions

U.S. APA member \$441, U.S. non-member \$690. For additional subscription options, including international and student rates, contact Customer Service at (202) 559-3900 or (800) 368-5777.

## Officers of the Association

Jeffrey Geller, M.D., M.P.H., *President*  
Vivian Pender, M.D., *President-Elect*  
Saul Levin, M.D., M.P.A., *CEO and Medical Director*

## Editorial Offices

Telephone: (202) 559-3897  
Journal Web site: [focus.psychiatryonline.org](http://focus.psychiatryonline.org)  
*Focus* CME: [education.psychiatry.org/diweb/mylearning](http://education.psychiatry.org/diweb/mylearning)

## Change of Address and Assistance With Subscriptions

Contact Customer Service at (202) 559-3900 or (800) 368-5777 or e-mail [appi@psych.org](mailto:appi@psych.org).

## CME

Email: [educme@psych.org](mailto:educme@psych.org)

## Online Access

Call (800) 368-5777 or e-mail [appi@psych.org](mailto:appi@psych.org) for assistance with online access to *Focus* and CME activities.

## APA Learning Center

[education.psychiatry.org](http://education.psychiatry.org)

Copyright © 2021, American Psychiatric Association

## Editor

Mark Hyman Rapaport, M.D.  
*Salt Lake City, Utah*

## Applied Armamentarium

Boadie Dunlop, M.D.  
*Atlanta, Georgia*

## Communication Commentary

Dorothy E. Stubbe, M.D.  
*New Haven, Connecticut*

## Ethics Commentary

Laura B. Dunn, M.D.  
*Palo Alto, California*  
Jarrod A. Marks, M.D.  
*Syracuse, New York*

## Patient Management Exercise

Ian A. Cook, M.D.  
*Los Angeles, California*

## Safety Commentary

Yad M. Jabbarpour, M.D.  
*Catawba, Virginia*

## Senior Advisory Board

Carol A. Bernstein, M.D.  
*New York, New York*  
Kathleen T. Brady, M.D., Ph.D.  
*Charleston, South Carolina*  
Peter F. Buckley, M.D.  
*Richmond, Virginia*  
Glen O. Gabbard, M.D.  
*Houston, Texas*  
Ira M. Lesser, M.D.  
*Torrance, California*  
Charles F. Reynolds III, M.D.  
*Pittsburgh, Pennsylvania*  
Pedro Ruiz, M.D.  
*Houston, Texas*  
Daniel K. Winstead, M.D.  
*New Orleans, Louisiana*  
Joel Yager, M.D.  
*Denver, Colorado*

## Editorial Board

Richard Balon, M.D.  
*Rochester Hills, Michigan*  
Joseph A. Cheong, M.D.  
*Nashville, Tennessee*  
Raymond Lam, M.D., F.R.C.P.C.  
*Vancouver, Canada*  
Sherrell T. Lam, MD, F.A.C.P.  
*Bethesda, Maryland*  
Avram H. Mack, M.D.  
*Philadelphia, Pennsylvania*

Vishal Madaan, M.D., M.B.B.S.  
*Charlottesville, Virginia*  
David Mischoulon, M.D., Ph.D.  
*Boston, Massachusetts*  
Francisco A. Moreno, M.D.  
*Tucson, Arizona*  
Philip R. Muskin, M.D.  
*New York, New York*  
Michele T. Pato, M.D., M.P.H.  
*Brooklyn, New York*  
Jeffrey Rakofsky, M.D.  
*Atlanta, Georgia*  
Victor I. Reus, M.D.  
*San Francisco, California*  
James W. Thompson, M.D., M.P.H.  
*Palm Beach, Florida*  
Marcia L. Verduin, M.D.  
*Orlando, Florida*  
Sidney Zisook, M.D.  
*San Diego, California*

## Associate Editors eFOCUS

David L. Fogelson, M.D.  
*Los Angeles, California*  
Robert J. Boland, M.D.  
*Boston, Massachusetts*

## Focus Self-Assessment

### Editorial Board

Rashi Aggarwal, M.D.  
*Newark, New Jersey*  
Nicole Cotton, M.D.  
*Atlanta, Georgia*  
Vikas Gupta, M.D., M.P.H.  
*Greenville, North Carolina*  
Venkata Kolli, M.B.B.S.  
*Columbus, Nebraska*  
John Luo, M.D.  
*Orange, California*  
Vishal Madaan, M.D.  
*Charlottesville, Virginia*  
Lindsay J. Moskowitz, M.D.  
*Greenwich, Connecticut*  
Jeffrey J. Rakofsky, M.D.  
*Atlanta, Georgia*  
Lorena Reyna, M.D.  
*Alton, Texas*  
John Teshima, M.D., M.Ed.  
*Toronto, Canada*  
Jose Vito, M.D.  
*New York, New York*

### Editor Emerita

Deborah J. Hales, M.D.  
*Washington, D.C.*

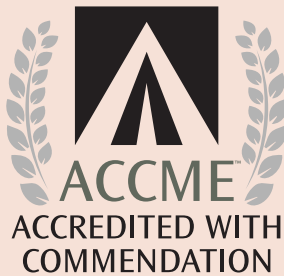

#### EDUCATIONAL OBJECTIVES

*Focus*, the APA clinical review and continuing medical education (CME) journal, is designed as a personal study resource to help practicing psychiatrists keep abreast of significant advances in the field, with particular attention to clinical practice.

With each issue, participants review current knowledge, recognize gaps in learning, and increase their understanding of an important topic in the field of psychiatry.

Participants also can prepare for an annual self-assessment designed to aid the physician in addressing areas where more study is needed to enhance management of patients.

#### TO EARN CME CREDIT

Each issue, prepared by distinguished faculty who are recognized leaders in their fields, incorporates a CME component. To earn CME credit for *Focus*, subscribers should read through the material presented in each issue. After reading the material, complete the CME Quiz online at [education.psychiatry.org/diweb/mylearning](http://education.psychiatry.org/diweb/mylearning), and earn credit with a passing score of 60%.

#### ACCREDITATION AND DESIGNATION

The American Psychiatric Association is accredited by the Accreditation Council for Continuing Medical Education (ACCME) to provide CME for physicians. The APA designates this journal-based CME activity for a maximum of 5 *AMA PRA Category 1 credits*<sup>™</sup>. Physicians should claim only the credit commensurate with the extent of their participation in the activity.

Neither the American Psychiatric Association nor American Psychiatric Association Publishing holds itself responsible for statements made in its publications by contributors. Unless so stated, material in *Focus* does not reflect the endorsement, official attitude, or position of the American Psychiatric Association, American Psychiatric Association Publishing, or the journal's Editorial Board.

Material published in the journals of the American Psychiatric Association is protected by copyright and all rights are reserved. Material may not be reproduced in any form or by any means without written permission from the copyright owner. For permission to reproduce material from American Psychiatric Association journals, please visit [www.appi.org/CustomerService/Pages/Permissions.aspx](http://www.appi.org/CustomerService/Pages/Permissions.aspx) for more information. Permission can also be secured through the Copyright Clearance Center ([www.copyright.com](http://www.copyright.com)). For bulk reprints, please contact [permissions@psych.org](mailto:permissions@psych.org).

This consent does not extend to other kinds of copying, such as copying for general distribution, for advertising or promotional purposes, for creating new collective works, or for resale. Permission need not be obtained for photocopying isolated articles for nonprofit classroom or library reserve use; all fees associated with such permission are waived.

# Focus

The Journal of Lifelong Learning in Psychiatry

"Lifelong Learning in Psychiatry" is an evolving series of educational initiatives developed by the American Psychiatric Association to meet the changing needs of psychiatrists for the 21st century.

*Focus* offers clinical reviews and original research for practicing psychiatrists to keep abreast of significant advances in the field. Developed as part of APA's "Lifelong Learning in Psychiatry" series—educational initiatives to meet the changing needs of psychiatrists for the 21st century—*Focus* has as its goal the dissemination of up-to-date information while facilitating lifelong study skills and critical self-assessment for improving patient care and preparation for maintenance of certification. Each issue is designed as a personal study resource with particular attention to clinical practice and offers opportunities to earn AMA PRA Category 1 Credit<sup>™</sup>.

#### The American Board of Psychiatry and Neurology

The American Board of Psychiatry and Neurology has reviewed *Focus: The Journal of Lifelong Learning in Psychiatry* and the *Focus Self-Assessment Examination* and has approved this program as part of a comprehensive lifelong learning and self-assessment program, which is mandated by the American Board of Medical Specialties as a necessary component of maintenance of certification.

#### Royal College of Physicians and Surgeons of Canada

The *Focus Self-Assessment* is an Accredited Self-Assessment Program (Section 3) as defined by the Maintenance of Certification Program of the Royal College of Physicians and Surgeons of Canada, and approved by the Canadian Psychiatric Association. You may claim a maximum of 24 hours (credits are automatically calculated).



**Editor and Advisor Program Planner Disclosure Listing for *Focus*, eFOCUS and *Focus*, Self-Assessment Editors, Associate Editors, Editorial Boards, and staff:**

Ian Cook, M.D., active biomedical device patents assigned to the University of California; CEO and director of HeartCloud Inc. and BrainCloud Corporation; CEO and board chair of NeuroSigma Inc. (on leave since 2016 as chief medical officer); equity interest in HeartCloud Inc. and the BrainCloud Corporation; stock options in NeuroSigma Inc. Boadie Dunlop, M.D., grant/research funding from Compass Pathways, Otsuka, Aptinix, Acadia; consultant at Myriad Neuroscience, Sage Therapeutics, Otsuka Pharmaceutical, Greenwich Biosciences. Raymond Lam, M.D., consultant: Allergan, Asia-Pacific Economic Cooperation, Canadian Network for Mood and Anxiety Treatments, Janssen, Lundbeck, Myriad Neuroscience, Otsuka, Pfizer; ad hoc speaking honoraria: Canadian Network for Mood and Anxiety Treatments, Canadian Psychiatric Association, Hansoh, Lundbeck, Lundbeck Institute, Pfizer; grant/research funding from BC Leading Edge Endowment Fund, Canadian Institutes of Health Research, Canadian Network for Mood and Anxiety Treatments, Healthy Minds Canada, Janssen, Lundbeck, Michael Smith Foundation for Health Research, MITACS, Ontario Brain Institute, St. Jude Medical, University Health Network Foundation, VGH-UBCH Foundation; book royalties: Cambridge University Press, Informa Press, Oxford University Press; copyright: Lam Employment Absence and Productivity Scale (LEAPS). Vishal Madaan, M.D., grant/research funding from Allergan, Boehringer-Ingelheim, Neurocrine, Otsuka, Pfizer, Shire, Supernus. David Mischoulon, M.D., Ph.D., employed part time, MGH Clinical Trials Network and Institute (CTNI), which has received research funding from multiple pharmaceutical companies and NIMH; grant/research funding from Nordic Naturals (donated omega-3 fatty acid medication and placebo for clinical trial) and heckel medizintechnik GmbH (supplied whole body hyperthermia device for clinical trial). Francisco A. Moreno, M.D., Liva Nova: DSMB chair. Jeffrey J. Rakofsky, M.D., grant/research funding from Compass, Otsuka. Sidney Zisook, M.D., grant/research funding from COMPASS Pathways.

**Editors and Members of the Editorial Boards of *Focus* and the *Focus* Self-Assessment and staff listed below report no disclosures:**

Rashi Aggarwal, M.D., Richard Balon, M.D., Carol A. Bernstein, M.D., Robert J. Boland, M.D., Kathleen T. Brady, M.D., Peter F. Buckley, M.D., Ph.D., Josepha A. Cheong, M.D., Nicole Cotton, M.D., Laura B. Dunn, M.D., David L. Fogelson, M.D., Glen O. Gabbard, M.D., Tristan Gorrindo, M.D., Vikas Gupta, M.D., M.P.H., Yad M. Jabbarpour, M.D., Venkata Kolli, M.B.B.S., Sherrell T. Lam, M.D., Ira M. Lesser, M.D., John Luo, M.D., Avram H. Mack, M.D., Jarrod A. Marks, M.D., Kristen Moeller, Lindsay J. Moskowitz, M.D., Philip R. Muskin, M.D., Michele T. Pato, M.D., M.P.H., Mark H. Rapaport, M.D., Lorena Reyna, M.D., Victor I. Reus, M.D., Charles F. Reynolds, III, M.D., Pedro Ruiz, M.D., Dorothy E. Stubbe, M.D., John Teshima, M.D., M.Ed., Ann Thomas, James W. Thompson, M.D., M.P.H., Marcia L. Verduin, M.D., Jose Vito, M.D., Daniel K. Winstead, M.D., Joel Yager, M.D.

**Improvement in Medical Practice/Performance in Practice (PIP) Clinical Modules Published in *Focus***

Contact American Psychiatric Association, Department of CME, [educme@psych.org](mailto:educme@psych.org) for information regarding revised end dates and updates to the MOC Part 4 PIP clinical modules. Performance in Practice modules are available to all *Focus* subscribers online in the APA Learning Center at [education.psychiatry.org](http://education.psychiatry.org).

The American Board of Psychiatry and Neurology has approved the following *Focus* Performance in Practice clinical chart review tools of the American Psychiatric Association as Maintenance of Certification, Part 4, Clinical Modules.

**Performance in Practice: Practice Assessment**

Tool for the Care of Patients with Schizophrenia

October 2020–October 2023

**Performance in Practice: Physician Practice Assessment**

Tool for the Assessment and Treatment of Adults at Risk for Suicide and Suicide-Related Behaviors

March 2011–March 2023

**Performance in Practice: Clinical Module for the Care of Patients with Posttraumatic Stress Disorder**

September 2018–September 2023

**Performance in Practice: Clinical Module for**

Screening Adult Psychiatric Patients for Substance Use Disorders

September 2018–September 2021

**PIP Clinical Modules online (MOC Part 4)**

FOCUS subscribers who are also APA members: Access and complete PIP Clinical Modules online in the APA Learning Center at [education.psychiatry.org](http://education.psychiatry.org) using your APA member login.

Non-member subscribers: Contact [educme@psych.org](mailto:educme@psych.org) for access to PIP Clinical Modules online at [education.psychiatry.org](http://education.psychiatry.org).

## FROM THE GUEST EDITOR

---

### 143 Anxiety and Stress-Related Disorders: From Current Evidence-Based Practices to Future Artificial Intelligence–Based Innovations

*Eric Bui, M.D., Ph.D.*

## FEATURES

---

### REVIEWS

### 145 Pharmacotherapy for Anxiety Disorders: From First-Line Options to Treatment Resistance

*Andrew J. Melaragno, M.D., M.S.*

Evidence is reviewed for psychopharmacologic treatments among adults for generalized anxiety disorder, panic disorder, and social anxiety disorder. Evidence-based medications in each major drug category as well as key safety and tolerability considerations are also reviewed.

### 161 Prolonged Grief Disorder: Course, Diagnosis, Assessment, and Treatment

*Kristin L. Szuhany, Ph.D., et al.*

The authors provide an overview of the course of grief and describe risk factors for developing prolonged grief disorder. The evolution of the diagnosis is discussed, and measures for assessing symptoms and severity are presented. The authors conclude with important future directions.

### 173 Mind-Body Interventions for Anxiety Disorders: A Review of the Evidence Base for Mental Health Practitioners

*Shaheja S. Bandealy, M.D., M.P.H., et al.*

The authors provide an overview of high-quality studies on mind-body interventions for the treatment of anxiety disorders. Overall, limited data were found on the efficacy of most mind-body modalities. The highest-quality data exist for yoga, mindfulness-based interventions, and applied relaxation.

## CLINICAL SYNTHESIS

### 184 Cognitive-Behavioral Treatments for Anxiety and Stress-Related Disorders

*Joshua E. Curtiss, Ph.D., et al.*

Cognitive-behavioral interventions for the treatment of anxiety and related disorders have some common and unique components. Cognitive-behavioral therapy can be used as a stand-alone treatment or combined with pharmacotherapy or a mindfulness-based intervention.

### 190 Psychedelics as Reemerging Treatments for Anxiety Disorders: Possibilities and Challenges in a Nascent Field

*Franklin King IV, MD., and Rebecca Hammond, M.D.*

A resurgence of research has shown that psychedelic-assisted psychotherapy, when used as a time-limited treatment, produces significant and durable results and represents a paradigm shift in the treatment of numerous psychiatric disorders, including anxiety disorders.

### 197 Beyond the DSM-5 Diagnoses: A Cross-Cultural Approach to Assessing Trauma Reactions

*Anushka R. Patel, Ph.D., and Brian J. Hall, Ph.D.*

Western psychiatric diagnoses such as PTSD may be limited in capturing the breadth of trauma reactions in cross-cultural contexts. Inclusion of cross-cultural assessment methods and diverse perspectives on health can capture culturally distinct reactions and account for ongoing stress and adversity.

## **21ST-CENTURY PSYCHIATRIST**

- 204 An Answer to “So What?” Implications of Network Theory for Research and Practice**  
*Payton J. Jones, M.A., and Donald R. Robinaugh, Ph.D.*

## **ASK THE EXPERT**

- 211 Anxiety Treatment With Benzodiazepines**  
*Jerrold F. Rosenbaum, M.D.*

## **ETHICS COMMENTARY**

- 212 Ethical Challenges in the Treatment of Anxiety**  
*Jarrod A. Marks, M.D., et al.*

---

## **INFLUENTIAL PUBLICATIONS**

- 217 Bibliography**
- 219 Abstracts**
- 222 Pharmacotherapy of Anxiety Disorders: Current and Emerging Treatment Options**  
*Amir Garakani, et al.*
- 243 Rising Tide: Responding to the Mental Health Impact of the COVID-19 Pandemic**  
*Sheila A. M. Rauch, et al.*
- 247 Translating Across Circuits and Genetics Toward Progress in Fear- and Anxiety-Related Disorders**  
*Kerry J. Ressler, M.D., Ph.D.*
- 256 Shared Neural Phenotypes for Mood and Anxiety Disorders A Meta-Analysis of 226 Task-Related Functional Imaging Studies**  
*Delfina Janiri, MD., et al.*
- 264 Continuing Medical Education Quiz**

---

## **DEPARTMENTS**

- 160 Call for Papers: 21st-Century Psychiatrist**
- 183 Call for Papers: The Applied Armamentarium**
- 189 Call for Papers**

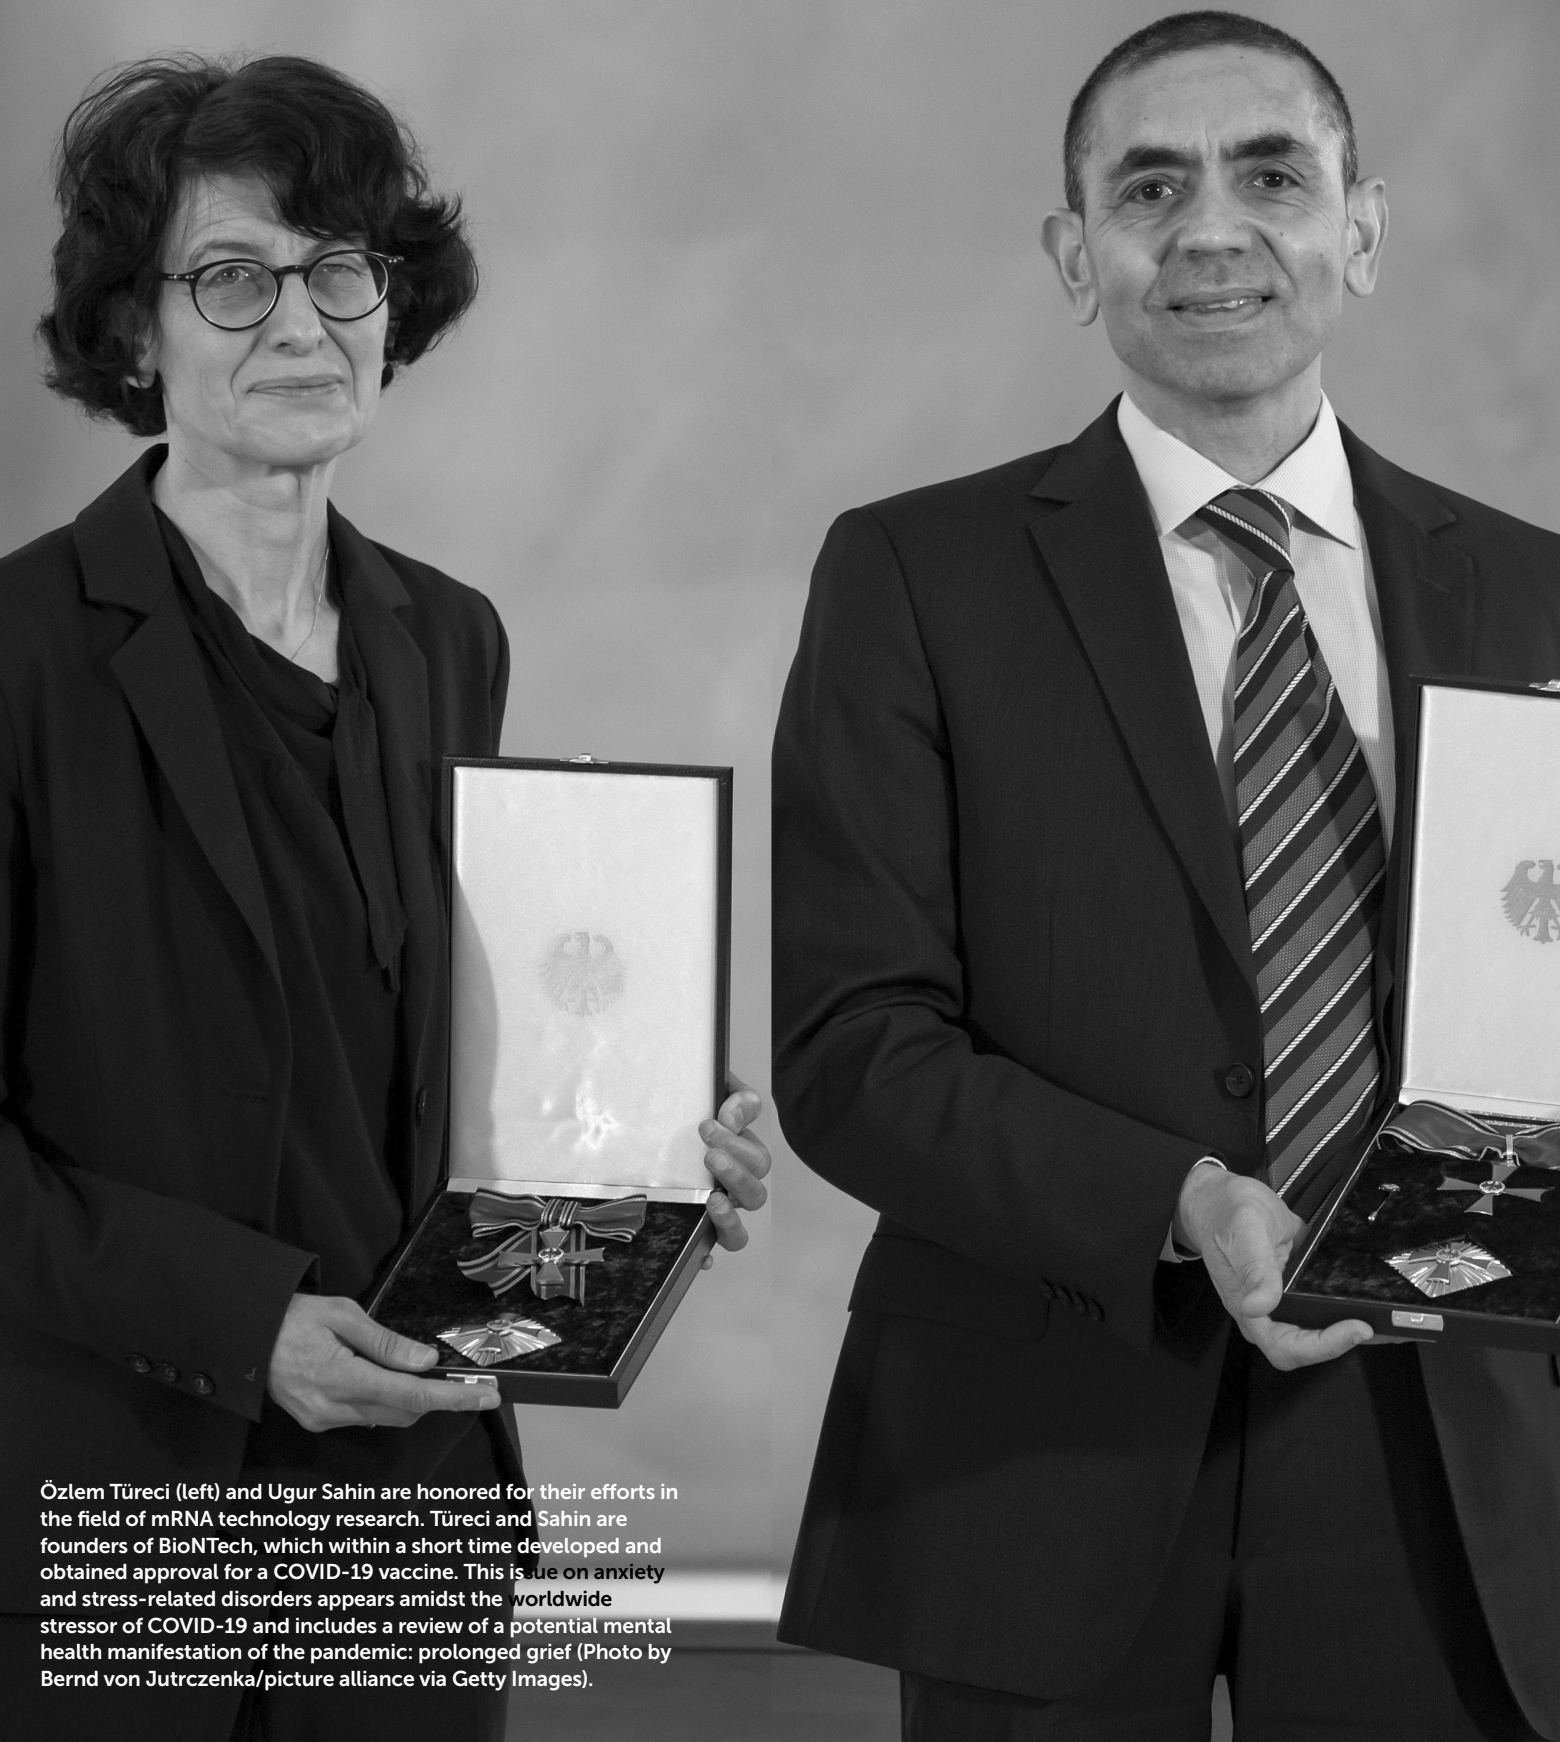

Özlem Türeci (left) and Ugur Sahin are honored for their efforts in the field of mRNA technology research. Türeci and Sahin are founders of BioNTech, which within a short time developed and obtained approval for a COVID-19 vaccine. This issue on anxiety and stress-related disorders appears amidst the worldwide stressor of COVID-19 and includes a review of a potential mental health manifestation of the pandemic: prolonged grief (Photo by Bernd von Jutrczenka/picture alliance via Getty Images).
